# Supplementary material for: A Nightmare for Males? A Maternally Transmitted Male-Killing Bacterium and Strong Female Bias in a Green Lacewing Population
Source: PubMed Central journal article supplement (PMC4909225; doi:10.1371/journal.pone.0155794), 2016-06-15
Supplement: pone.0155794.s002.pdf [file pone.0155794.s002.pdf]

**S1 Table. PCR primers used in this study.**

| Primers              | Sequence (5' -> 3')        | Target                | Amplicon length (bp)                             | References                             |
|----------------------|----------------------------|-----------------------|--------------------------------------------------|----------------------------------------|
| spoT-f (sense)       | CAAACAAAAGGACAAATTGAAG     | Spiroplasma<br>spoT   | 513 (spoT-f & spoT-r)<br>222 (spoT-MDF & spoT-r) | Montenegro et al. (2005)<br>this study |
| spoT-r (antisense)   | CACTGAAGCGTTTTAAATGAC      |                       |                                                  |                                        |
| spoT-MDF (sense)     | TGCCAATTCCATATGAAGAC       |                       |                                                  |                                        |
| RpoBF1 (sense)       | ATGGATCAAACAATCCATTAGCAGA  | Spiroplasma           | 1292                                             | Haselkorn et al. (2009)                |
| RpoBR4 (antisense)   | CTTTGTTTCCATGGCGTCCAGCC    | RpoB                  |                                                  |                                        |
| wsp81F (sense)       | TGGTCCAATAAGTGATGAAGAAAC   | Wolbachia             | 611                                              | Braig et al. (1998)                    |
| wsp691R (antisense)  | AAAAATTAACGCTACTCCA        | wsp                   |                                                  |                                        |
| Rb-F (sense)         | GCTCAGAACGAACGCTATC        | Rickettsia            | ~900                                             | Gottlieb et al. (2006)                 |
| Rb-R (antisense)     | GAAGGAAAGCATCTCTGC         | 16S rRNA              |                                                  |                                        |
| glt375-F (sense)     | TGGTATTGCATCGCTTTGGG       | Rickettsia            | 200                                              | Caspi-Fluger et al. (2011)             |
| glt574-R (antisense) | TTTCTTTAAGCACTGCAGCACG     | gltA                  |                                                  |                                        |
| 16SA1 (sense)        | AGAGTTTGATCMTGGCTCAG       | bacterial 16S<br>rRNA | ~1500 (16SA1 & 16SB1)                            | Fukatsu and Nikoh (1998)               |
| 16SB1 (antisense)    | TACGGYTACCTTGTACGACTT      |                       |                                                  |                                        |
| 16SA2 (sense)        | GTGCCAGCAGCCGCGGTAATAC     |                       |                                                  |                                        |
| 16SB2 (antisense)    | CGAGCTGACGACARCCATGCA      |                       |                                                  |                                        |
| C2-J3399 (sense)     | ACAATTGGTCAYCAATGATAYTG    | mitochondrial         | 267                                              | Simon et al. (2006)                    |
| C2-N3665 (antisense) | CCACAAATTTCTGAACATTG       | COII                  |                                                  |                                        |
| LCO1490 (sense)      | GGTCAACAAATCATAAAGATATTGG  | mitochondrial         | 709                                              | Folmer et al. (1994)                   |
| HCO2198 (antisense)  | TAAACTTCAGGGTGACCAAAAAATCA | COI                   |                                                  |                                        |

**References**

- Braig HR, Zhou W, Dobson SL and O'Neill SL (1998) Cloning and characterization of a gene encoding the major surface protein of the bacterial endosymbiont *Wolbachia pipientis*. *J. Bacteriol.* 180: 2373–2378.
- Caspi-Fluger A, Inbar M, Mozes-Daube N, Mouton L, Hunter MS and Zchori-Fein E (2011) *Rickettsia* 'in' and 'out': two different localization patterns of a bacterial symbiont in the same insect species. *PLoS One* 6:e21096.
- Folmer O, Black M, Hoeh W, Lutz R and Vriegenhoek R (1994) DNA primers for amplification of mitochondrial cytochrome c oxidase subunit I from diverse metazoan invertebrates. *Mol. Mar. Biol. Biotechnol.* 3: 294-299.
- Fukatsu T and Nikoh N (1998) Two intracellular symbiotic bacteria of the mulberry psyllid *Anomoneura mori* (Insecta, Homoptera). *Appl. Environ. Microbiol.* 64:3599–3606.
- Gottlieb Y, Ghanim M, Chiel E, Gerling D, Portnoy V, Steinberg S, Tzuri G, Horowitz AR, Belausov E, Mozes-Daube N, Kontsedalov S, Gershon M, Gal S, Katzir N and Zchori-Fein E (2006) Identification and localization of a *Rickettsia* sp. in *Bemisia tabaci* (Homoptera : Aleyrodidae). *Appl. Environ. Microbiol.* 72: 3646–3652.
- Haselkorn TS, Markow TA, Moran NA (2009) Multiple introductions of the *Spiroplasma* bacterial endosymbiont into *Drosophila*. *Molecular Ecology* 18: 1294–1305.
- Montenegro H, Solferini VN, Klaczko LB and Hurst GD (2005) Male-killing *Spiroplasma* naturally infecting *Drosophila melanogaster*. *Insect Mol. Biol.* 14: 281–287.
- Simon C, Buckley TR, Frati F, Stewart JB and Beckenbach AT (2006) Incorporating molecular evolution into phylogenetic analysis, and a new compilation of conserved polymerase chain reaction primers for animal mitochondrial DNA. *Annu. Rev. Ecol. Evol. Syst.* 37: 545–579.
