# Supplementary material for: A Nightmare for Males? A Maternally Transmitted Male-Killing Bacterium and Strong Female Bias in a Green Lacewing Population
Source: PubMed Central journal article supplement (PMC4909225; doi:10.1371/journal.pone.0155794), 2016-06-15
Supplement: pone.0155794.s003.pdf [file pone.0155794.s003.pdf]

S2 Table. Survivorship and sex ratio of F1 offspring.

|                                    | Individual no. | Infection status | Eggs laid | No. of died individuals (F1) |        |       |               | Egg hatch rate | Survival rate | Female | Male         | Proportion of females (n) | Line code |
|------------------------------------|----------------|------------------|-----------|------------------------------|--------|-------|---------------|----------------|---------------|--------|--------------|---------------------------|-----------|
|                                    |                |                  |           | Eggs                         | Larvae | Pupae | Pharate-adult |                |               |        |              |                           |           |
| <b>(a) All-female</b>              | #5             | S+R-             | 156       | 85                           | ND     | ND    | ND            | 0.455          | 0.404         | 63     | 0            | 1.000 (63)***             | MK5       |
|                                    | #10            | S+R-             | 146       | 11                           | 55     | 6     | 8             | 0.925          | 0.452         | 66     | 0            | 1.000 (66)***             | MK10      |
|                                    | #27            | S+R-             | 64        | 21                           | 11     | 0     | 0             | 0.672          | 0.500         | 32     | 0            | 1.000 (32)***             | MK27      |
|                                    | #28            | S+R-             | 112       | 9                            | 41     | 2     | 2             | 0.920          | 0.518         | 58     | 0            | 1.000 (58)***             | MK28      |
|                                    | #34            | S+R-             | 73        | 9                            | 28     | 0     | 0             | 0.877          | 0.493         | 36     | 0            | 1.000 (36)***             | MK34      |
|                                    | #48            | S+R-             | 57        | 14                           | 29     | 7     | 1             | 0.754          | 0.105         | 6      | 0            | 1.000 (6)*                | MK48      |
|                                    | #3             | S+R+             | 103       | 57                           | ND     | ND    | ND            | 0.447          | 0.359         | 37     | 0            | 1.000 (37)***             | MK3       |
|                                    | #7             | S+R+             | 130       | 40                           | 30     | 0     | 0             | 0.692          | 0.462         | 60     | 0            | 1.000 (60)***             | MK7       |
|                                    | #8             | S+R+             | 131       | 60                           | 11     | 1     | 0             | 0.542          | 0.450         | 59     | 0            | 1.000 (59)***             | MK8       |
|                                    | #12            | S+R+             | 104       | 32                           | 29     | 0     | 0             | 0.692          | 0.413         | 43     | 0            | 1.000 (43)***             | MK12      |
|                                    | #15            | S+R+             | 121       | 51                           | 17     | 0     | 10            | 0.579          | 0.355         | 43     | 0            | 1.000 (43)***             | MK15      |
|                                    | #17            | S+R+             | 129       | 25                           | 54     | 1     | 3             | 0.806          | 0.357         | 46     | 0            | 1.000 (46)***             | MK17      |
|                                    | #19            | S+R+             | 101       | 47                           | 7      | 0     | 1             | 0.535          | 0.455         | 46     | 0            | 1.000 (46)***             | MK19      |
|                                    | #20            | S+R+             | 89        | 53                           | 4      | 0     | 0             | 0.404          | 0.360         | 32     | 0            | 1.000 (32)***             | MK20      |
|                                    | #22            | S+R+             | 83        | 25                           | 17     | 2     | 0             | 0.699          | 0.470         | 39     | 0            | 1.000 (39)***             | MK22      |
|                                    | #26            | S+R+             | 154       | 9                            | 20     | 55    | 0             | 0.942          | 0.455         | 70     | 0            | 1.000 (70)***             | MK26      |
|                                    | #29            | S+R+             | 111       | 21                           | 36     | 1     | 1             | 0.811          | 0.468         | 52     | 0            | 1.000 (52)***             | MK29      |
|                                    | #32            | S+R+             | 169       | 50                           | 54     | 0     | 4             | 0.704          | 0.361         | 61     | 0            | 1.000 (61)***             | MK32      |
|                                    | #33            | S+R+             | 66        | 27                           | 4      | 0     | 0             | 0.591          | 0.530         | 35     | 0            | 1.000 (35)***             | MK33      |
|                                    | #43            | S+R+             | 91        | 44                           | 4      | 0     | 1             | 0.516          | 0.462         | 42     | 0            | 1.000 (42)***             | MK43      |
| #45                                | S+R+           | 61               | 37        | 9                            | 0      | 1     | 0.393         | 0.230          | 14            | 0      | 1.000 (14)** | MK45                      |           |
| <b>(b) Female-biased sex ratio</b> | #9             | S+R+             | 140       | 17                           | 39     | 24    | 4             | 0.879          | 0.400         | 49     | 7            | 0.875 (56)***             | MK'9      |
|                                    | #30            | S+R+             | 105       | 16                           | 18     | 3     | 0             | 0.848          | 0.648         | 46     | 22           | 0.676 (68)*               | MK'30     |
|                                    | #2             | S-R+             | 189       | 91                           | ND     | ND    | ND            | 0.519          | 0.434         | 70     | 12           | 0.854 (82)***             | MK'2      |
| <b>(c) Normal sex ratio</b>        | #21            | S+R+             | 166       | 9                            | 6      | 0     | 4             | 0.946          | 0.916         | 72     | 80           | 0.474 (152)               | N21       |
|                                    | #46            | S+R+             | 60        | 1                            | 17     | 6     | 4             | 0.983          | 0.533         | 14     | 18           | 0.438 (32)                | N46       |
|                                    | #4             | S-R+             | 190       | 18                           | ND     | ND    | ND            | 0.905          | 0.763         | 72     | 73           | 0.497 (145)               | N4        |
|                                    | #18            | S-R+             | 69        | 5                            | 1      | 1     | 5             | 0.928          | 0.826         | 30     | 27           | 0.526 (57)                | N18       |
|                                    | #24            | S-R+             | 96        | 11                           | 13     | 1     | 6             | 0.885          | 0.677         | 43     | 22           | 0.661 (65)                | N24       |
|                                    | #31            | S-R+             | 84        | 8                            | 4      | 0     | 4             | 0.905          | 0.810         | 40     | 28           | 0.588 (68)                | N31       |
|                                    | #44            | S-R+             | 122       | 16                           | 6      | 1     | 7             | 0.869          | 0.754         | 49     | 43           | 0.533 (92)                | N44       |
|                                    | #6             | S-R-             | 166       | 21                           | ND     | ND    | ND            | 0.873          | 0.657         | 51     | 58           | 0.468 (109)               | N6        |
|                                    | #13            | S-R-             | 90        | 3                            | 5      | 0     | 9             | 0.967          | 0.811         | 30     | 43           | 0.411 (73)                | N13       |
|                                    | #14            | S-R-             | 118       | 46                           | 6      | 1     | 8             | 0.610          | 0.483         | 28     | 29           | 0.491 (57)                | N14       |
|                                    | #1             | NA               | 172       | 42                           | ND     | ND    | ND            | 0.756          | 0.552         | 41     | 54           | 0.432 (95)                | N1        |
| <b>Total</b>                       |                |                  |           |                              |        |       |               |                |               | 1575   | 516          | 0.826 (2091)              |           |

\*P < 0.05; \*\*\*P < 0.001

S+ and S- indicate positive and negative for Spiroplasma, respectively.

R+ and R- indicate positive and negative for Rickettsia, respectively.

ND, no data
