# Supplementary material for: A Nightmare for Males? A Maternally Transmitted Male-Killing Bacterium and Strong Female Bias in a Green Lacewing Population
Source: PubMed Central journal article supplement (PMC4909225; doi:10.1371/journal.pone.0155794), 2016-06-15
Supplement: pone.0155794.s004.pdf [file pone.0155794.s004.pdf]

**S3 Table. qPCR data performed for wild-caught females, which were DNA extracted posterior to oviposition.**

| Samples | Infection status | F1 sex ratio  | Mean conc. (copies/ul) |            |              | gltA/COII (Ric) | spoT/COII (Spiro) | gltA/spoT (Ric/Spiro) | Egg hatch rate |
|---------|------------------|---------------|------------------------|------------|--------------|-----------------|-------------------|-----------------------|----------------|
|         |                  |               | COII                   | gltA (Ric) | spoT (Spiro) |                 |                   |                       |                |
| #5      | S+R-             | all-female    | 2.63E+06               | -          | 1.19E+02     | -               | 4.53E-05          | -                     | 0.455          |
| #10     | S+R-             | all-female    | 1.88E+06               | -          | 1.71E+01     | -               | 9.10E-06          | -                     | 0.925          |
| #27     | S+R-             | all-female    | 2.06E+06               | -          | 8.31E+01     | -               | 4.04E-05          | -                     | 0.672          |
| #28     | S+R-             | all-female    | 2.03E+06               | -          | 1.68E+02     | -               | 8.26E-05          | -                     | 0.92           |
| #34     | S+R-             | all-female    | 2.86E+06               | -          | 1.98E+02     | -               | 6.92E-05          | -                     | 0.877          |
| #48     | S+R-             | all-female    | 3.41E+06               | -          | 2.00E+02     | -               | 5.87E-05          | -                     | 0.754          |
| #3      | S+R+             | all-female    | 3.75E+06               | 5.70E+04   | 1.32E+02     | 1.52E-02        | 3.53E-05          | 430.47                | 0.447          |
| #7      | S+R+             | all-female    | 2.37E+06               | 7.97E+04   | 5.80E+01     | 3.37E-02        | 2.45E-05          | 1373.18               | 0.692          |
| #8      | S+R+             | all-female    | 2.07E+06               | 2.42E+04   | 9.32E+01     | 1.17E-02        | 4.49E-05          | 260.23                | 0.542          |
| #12     | S+R+             | all-female    | 1.96E+06               | 8.51E+04   | 3.15E+02     | 4.34E-02        | 1.60E-04          | 270.43                | 0.692          |
| #15     | S+R+             | all-female    | 1.67E+06               | 3.22E+04   | 9.79E+01     | 1.92E-02        | 5.85E-05          | 328.86                | 0.579          |
| #17     | S+R+             | all-female    | 1.35E+06               | 5.31E+04   | 1.95E+02     | 3.93E-02        | 1.44E-04          | 272.13                | 0.806          |
| #19     | S+R+             | all-female    | 2.92E+06               | 3.55E+04   | 1.26E+02     | 1.22E-02        | 4.32E-05          | 281.44                | 0.535          |
| #20     | S+R+             | all-female    | 2.03E+06               | 3.41E+04   | 1.13E+01     | 1.68E-02        | 5.59E-06          | 3011.32               | 0.404          |
| #22     | S+R+             | all-female    | 3.63E+06               | 1.44E+04   | 1.97E+02     | 3.97E-03        | 5.44E-05          | 72.86                 | 0.699          |
| #26     | S+R+             | all-female    | 3.56E+06               | 6.19E+04   | 7.93E+01     | 1.74E-02        | 2.23E-05          | 780.44                | 0.942          |
| #29     | S+R+             | all-female    | 3.68E+06               | 1.41E+05   | 3.13E+02     | 3.83E-02        | 8.49E-05          | 451.53                | 0.811          |
| #32     | S+R+             | all-female    | 4.34E+06               | 3.62E+05   | 4.35E+02     | 8.33E-02        | 1.00E-04          | 832.66                | 0.704          |
| #33     | S+R+             | all-female    | 3.06E+06               | 7.66E+04   | 2.83E+02     | 2.50E-02        | 9.26E-05          | 270.09                | 0.591          |
| #43     | S+R+             | all-female    | 3.09E+06               | 1.26E+04   | 3.08E+02     | 4.09E-03        | 9.97E-05          | 40.98                 | 0.516          |
| #45     | S+R+             | all-female    | 4.93E+06               | 3.86E+04   | 6.66E+02     | 7.82E-03        | 1.35E-04          | 57.93                 | 0.393          |
| #9      | S+R+             | female-biased | 2.26E+06               | 6.82E+04   | 6.50E+01     | 3.02E-02        | 2.87E-05          | 1049.05               | 0.879          |
| #30     | S+R+             | female-biased | 3.65E+06               | 1.21E+05   | 3.89E+02     | 3.31E-02        | 1.07E-04          | 310.26                | 0.848          |
| #2      | S-R+             | female-biased | 1.49E+06               | 5.31E+04   | -            | 3.56E-02        | -                 | -                     | 0.519          |
| #21     | S+R+             | normal        | 1.70E+06               | 3.61E+04   | 3.12E+01     | 2.13E-02        | 1.84E-05          | 1154.23               | 0.946          |
| #46     | S+R+             | normal        | 1.76E+06               | 6.04E+04   | 2.13E+01     | 3.43E-02        | 1.21E-05          | 2828.93               | 0.983          |
| #4      | S-R+             | normal        | 3.33E+06               | 7.88E+04   | -            | 2.37E-02        | -                 | -                     | 0.905          |
| #18     | S-R+             | normal        | 2.16E+06               | 2.31E+04   | -            | 1.07E-02        | -                 | -                     | 0.928          |
| #24     | S-R+             | normal        | 2.68E+06               | 3.03E+04   | -            | 1.13E-02        | -                 | -                     | 0.885          |
| #31     | S-R+             | normal        | 2.29E+06               | 4.67E+04   | -            | 2.04E-02        | -                 | -                     | 0.905          |
| #44     | S-R+             | normal        | 3.17E+06               | 7.59E+04   | -            | 2.40E-02        | -                 | -                     | 0.869          |
| #6      | S-R-             | normal        | 2.26E+06               | -          | -            | -               | -                 | -                     | 0.873          |
| #13     | S-R-             | normal        | 1.21E+06               | -          | -            | -               | -                 | -                     | 0.967          |
| #14     | NA               | normal        | 1.92E+06               | -          | -            | -               | -                 | -                     | 0.61           |

S+ and S- indicate positive and negative for Spiroplasma, respectively.

R+ and R- indicate positive and negative for Rickettsia, respectively.

NA: not examined
