# Supplementary material for: A Nightmare for Males? A Maternally Transmitted Male-Killing Bacterium and Strong Female Bias in a Green Lacewing Population
Source: PubMed Central journal article supplement (PMC4909225; doi:10.1371/journal.pone.0155794), 2016-06-15
Supplement: pone.0155794.s005.pdf [file pone.0155794.s005.pdf]

**S4 Table. Bacterial contents inferred from the 16S rRNA gene sequencing.**

| Wild-caught females<br>(mothers) | Results of<br>diagnostic PCR | No. of inserted colonies <sup>1</sup> |             |                       |       |
|----------------------------------|------------------------------|---------------------------------------|-------------|-----------------------|-------|
|                                  |                              | Rickettsia                            | Spiroplasma | Others                | Total |
| #2                               | S-R+                         | 24                                    | 0           | -                     | 24    |
| #3                               | S+R+                         | 12                                    | 2           | 1 (Asaia sp.)         | 15    |
| #5                               | S+R-                         | 0                                     | 25          | -                     | 25    |
| #9                               | S+R+                         | 11                                    | 2           | -                     | 13    |
| #20                              | S+R+                         | 22                                    | 2           | 1 (Acinetobacter sp.) | 25    |

<sup>1</sup>Results of sequencing
