# Supplementary material for: A Nightmare for Males? A Maternally Transmitted Male-Killing Bacterium and Strong Female Bias in a Green Lacewing Population
Source: PubMed Central journal article supplement (PMC4909225; doi:10.1371/journal.pone.0155794), 2016-06-15
Supplement: pone.0155794.s006.pdf [file pone.0155794.s006.pdf]

**S5 Table. Infection status of F1 offspring.**

| Line                                | Sex    | Infection status |      |      |      |    | Total |
|-------------------------------------|--------|------------------|------|------|------|----|-------|
|                                     |        | S+R+             | S+R- | S-R+ | S-R- | NA |       |
| <b>(a) Doubly infected lines</b>    |        |                  |      |      |      |    |       |
| MK3(S+R+)                           | Female | 8                | 0    | 0    | 0    | 29 | 37    |
| MK7(S+R+)                           | Female | 8                | 0    | 0    | 0    | 52 | 60    |
| MK8(S+R+)                           | Female | 8                | 0    | 0    | 0    | 51 | 59    |
| MK12(S+R+)                          | Female | 8                | 0    | 0    | 0    | 35 | 43    |
| MK20(S+R+)                          | Female | 8                | 0    | 0    | 0    | 24 | 32    |
| MK26(S+R+)                          | Female | 8                | 0    | 0    | 0    | 62 | 70    |
| MK43(S+R+)                          | Female | 8                | 0    | 0    | 0    | 34 | 42    |
| MK'9(S+R+)                          | Female | 12               | 0    | 0    | 0    | 37 | 49    |
|                                     | Male   | 0                | 0    | 7    | 0    | 0  | 7     |
| MK'30(S+R+)                         | Female | 11               | 1    | 0    | 0    | 34 | 46    |
|                                     | Male   | 12               | 0    | 0    | 0    | 10 | 22    |
| N21(S+R+)                           | Female | 12               | 0    | 0    | 0    | 60 | 72    |
|                                     | Male   | 11               | 0    | 1    | 0    | 68 | 80    |
| N46(S+R+)                           | Female | 9                | 0    | 0    | 0    | 5  | 14    |
|                                     | Male   | 12               | 0    | 0    | 0    | 6  | 18    |
| <b>(b) Rickettsia-infected line</b> |        |                  |      |      |      |    |       |
| MK'2(S-R+)                          | Female | 0                | 0    | 8    | 0    | 62 | 70    |
|                                     | Male   | 0                | 0    | 8    | 0    | 4  | 12    |

S+ and S- indicate positive and negative for Spiroplasma, respectively.

R+ and R- indicate positive and negative for Rickettsia, respectively.

NA, not analysed
